# Supplementary material for: In Vivo Parieto-Occipital White Matter Metabolism Is Correlated with Visuospatial Deficits in Adult DM1 Patients
Source: MDPI journal article supplement (doi:10.3390/diagnostics12102305), 2022-09-24
Supplement: s1 [file s1]

**Supplementary Table S1.** Summary of previous brain <sup>1</sup>H-MRS studies in DM1 patients.

|                                   | Hashimoto et al., 1995 [9] | Chang et al., 1998 [10]                                                     | Akiguchi et al., 1999 [11]                                            | Vielhaber et al., 2006 [12]       | Takado et al., 2015 [13]                                                               | Gramegna et al., 2018 [14]               |
|-----------------------------------|----------------------------|-----------------------------------------------------------------------------|-----------------------------------------------------------------------|-----------------------------------|----------------------------------------------------------------------------------------|------------------------------------------|
| <b>Scanner magnetic field</b>     | 1.5T                       | 1.5T                                                                        | 1.5T                                                                  | 1.5T                              | 3T                                                                                     | 1.5T                                     |
| <b><sup>1</sup>H-MRS Sequence</b> | SVS STEAM or SE            | SVS PRESS                                                                   | SVS STEAM                                                             | SVS PRESS                         | SVS PRESS                                                                              | SVS PRESS                                |
|                                   | TE/TR= 270/1500ms          | TE/TR= 30/3000ms                                                            | TE/TR= 19/2500ms                                                      | TE/TR= 135/1500ms                 | TE/TR= 30/1500ms                                                                       | TE/TR= 288/1550ms                        |
| <b>MRS Localization</b>           |                            |                                                                             |                                                                       |                                   | MRSI PRESS                                                                             |                                          |
|                                   |                            |                                                                             |                                                                       |                                   | TE/TR= 144/1500ms                                                                      |                                          |
|                                   | GM (volume 8-27 ml)        | GM (volume 3-5 ml)                                                          | GM (volume 27 ml)                                                     | GM, WM (volume 4.8-6 ml)          | GM, WM (volume SVS 4.1ml, MRSI 18×18cm2 or 20×20cm2)                                   | CSF (volume 4.7-10.1 ml)                 |
|                                   | Parietal (5/5 pts)         | Midoccipital                                                                | Insular cortex, included the frontal, temporal, and parietal opercula | Midoccipital and temporoparietal  | SVS: frontal GM (anterior cingulate gyrus)                                             | Lateral ventricles                       |
|                                   | Left occipital (3/5 pts)   | Left temporoparietal                                                        |                                                                       | Frontal                           | frontal WM                                                                             |                                          |
|                                   | Frontal cortex (1 pt)      |                                                                             |                                                                       |                                   | MRSI: two 10-mm axial slices through the basal ganglia or the upper lateral ventricles |                                          |
| <b>Measured metabolites</b>       | NAA, Cho, Cr               | NAA, Cho, Cr, ml, Glx                                                       | NAA, Cho, Cr                                                          | NAA, Cho, Cr                      | NAA, Cho, Cr, ml, Glu, Gln, Glx                                                        | Lac                                      |
| <b>Spectra analysis</b>           | Peak height evaluation     | Manufacturer platform and semi-automatic software (absolute quantification) | In-house software                                                     | LCModel (absolute quantification) | Manufacturer platform and LCModel                                                      | JMRUI                                    |
| <b>DM1 Cohort size</b>            | 5                          | 13                                                                          | 21                                                                    | 14 DM1<br>15 DM2                  | 14                                                                                     | 25                                       |
| <b>DM1 Diagnosis</b>              | Congenital MD              | Clinical diagnosis                                                          | Clinical diagnosis (no congenital)                                    | Genetically confirmed             | Genetically confirmed                                                                  | Genetically confirmed (1 congenital DM1) |

|                                                           |                                                                                                                                                      |                                                                                                                                                                                                                              |                                                                                                                                                                                                                      |                                                                                                                                                                                                                                                           |                                                                                                                                                                                                                                                                                                                             |                                                                                                                                                                                                                          |
|-----------------------------------------------------------|------------------------------------------------------------------------------------------------------------------------------------------------------|------------------------------------------------------------------------------------------------------------------------------------------------------------------------------------------------------------------------------|----------------------------------------------------------------------------------------------------------------------------------------------------------------------------------------------------------------------|-----------------------------------------------------------------------------------------------------------------------------------------------------------------------------------------------------------------------------------------------------------|-----------------------------------------------------------------------------------------------------------------------------------------------------------------------------------------------------------------------------------------------------------------------------------------------------------------------------|--------------------------------------------------------------------------------------------------------------------------------------------------------------------------------------------------------------------------|
| <b>CGT repeat length mean <math>\pm</math> sd (range)</b> | NA                                                                                                                                                   | 847 $\pm$ 314 (173 - 1434)                                                                                                                                                                                                   | CTG expansion confirmed in 3 patients                                                                                                                                                                                | Range 250–750                                                                                                                                                                                                                                             | 685 $\pm$ 462                                                                                                                                                                                                                                                                                                               | E1 (50-150 CTG repeats): 4 pts<br><br>E2 (150-1000 CTG repeats): 14 pts<br><br>E3 (> 1000 CTG repeats): 7 pts                                                                                                            |
| <b>Age, years mean <math>\pm</math> sd</b>                | 7.3 $\pm$ 5.5<br>(range 13 months - 14 years)                                                                                                        | 37.8 $\pm$ 2.7                                                                                                                                                                                                               | 37.0 $\pm$ 13.6                                                                                                                                                                                                      | 38.8 $\pm$ 9.1 (DM1)<br><br>38.6 $\pm$ 7.8 (DM2)                                                                                                                                                                                                          | 43.6 $\pm$ 12.6                                                                                                                                                                                                                                                                                                             | 39 $\pm$ 11                                                                                                                                                                                                              |
| <b>Disease duration, years mean <math>\pm</math> sd</b>   | Congenital                                                                                                                                           | 13.8 $\pm$ 3.5                                                                                                                                                                                                               | 11.2 $\pm$ 7.6                                                                                                                                                                                                       | 8.5 $\pm$ 4.1 (DM1)<br><br>9.5 $\pm$ 6.8 (DM2)                                                                                                                                                                                                            | 11.8 $\pm$ 9.0                                                                                                                                                                                                                                                                                                              | 16 $\pm$ 11                                                                                                                                                                                                              |
| <b>Age-matched healthy controls</b>                       | 46 children, 1 adult                                                                                                                                 | 24                                                                                                                                                                                                                           | 16                                                                                                                                                                                                                   | 13                                                                                                                                                                                                                                                        | 13                                                                                                                                                                                                                                                                                                                          | 14                                                                                                                                                                                                                       |
| <b>Investigated correlations</b>                          | Age                                                                                                                                                  | CTG expansion                                                                                                                                                                                                                | Age, MMSE or HDS                                                                                                                                                                                                     | Age, age at onset, disease duration, CTG expansion, MMSE                                                                                                                                                                                                  | Disease duration, CTG expansion, MMSE, FAB                                                                                                                                                                                                                                                                                  | Age at onset, CTG expansion, DM1 functional scale                                                                                                                                                                        |
| <b>Findings</b>                                           | <ul style="list-style-type: none"> <li>Lower NAA/Cr in all patients except one (13-month-old) also in regions normal at morphological MRI</li> </ul> | <ul style="list-style-type: none"> <li>Higher ml, Cr and Cho concentration</li> <li>Positive correlation between ml and Cr levels and CTG repeat size</li> <li>Trend for NAA level decrease with disease duration</li> </ul> | <ul style="list-style-type: none"> <li>Lower NAA/Cr and NAA/Cho</li> </ul>                                                                                                                                           | <ul style="list-style-type: none"> <li>Comparing to healthy controls lower NAA content both in GM and WM in both disease groups</li> <li>Comparing to healthy controls reduced Cr and Cho in TPGM and FWM only in DM1</li> <li>No correlations</li> </ul> | <ul style="list-style-type: none"> <li>MRSI: reduced NAA/Cr in multiple brain regions</li> <li>SVS: reduced NAA in frontal cortex and frontal WM</li> <li>Elevated glutamine in the frontal GM</li> <li>Reduced glutamate in the frontal WM</li> <li>NAA/Cr in the frontal lobe correlate with CTG repeat length</li> </ul> | <ul style="list-style-type: none"> <li>8 patients with pathological accumulation of brain lactate</li> <li>Compared to those without, larger lateral ventricles, smaller GM volume and higher WM lesion load.</li> </ul> |
| <b>Interpretation</b>                                     | Findings suggest a neurodevelopmental disorder.                                                                                                      | Findings suggest an increased glial content, more prominent in the midoccipital than in the temporoparietal cortex, related to the severity of disease.                                                                      | Metabolic changes detected in the younger patients and their slow decline with age suggest a neurodevelopment disorder. No differences in MRS changes between patients with (16/21) and without (5/21) NPS deficits. | Although structural MRI abnormalities are similar between DM1 and DM2, <sup>1</sup> H-MRS is able to differentiate between the two disease subgroups with an overall accuracy of 88%.                                                                     | Glutamatergic system abnormalities associated with synaptic dysfunction.                                                                                                                                                                                                                                                    | Evidence of brain oxidative metabolism deficit.                                                                                                                                                                          |

<sup>1</sup>H-MRS: proton magnetic resonance spectroscopy, SE=Spin Echo , CTG: cytosine–thymine–guanine, SVS: single voxel spectroscopy, MRSI: magnetic resonance spectroscopy imaging, STEAM: STimulated Echo Acquisition Mode, PRESS: Point RESolved Spectroscopy, NAA: n-acetyl-aspartate, Cho: choline, Cr: creatine, mI: myo-inositol, Glx: Glutamate-Glutamine, Glu: glutamate, Gln: glutamine, , MMSE: Mini-mental state examination, FAB: frontal assessment battery, HDS: Hasegawa Dementia Scale testing.

**Supplementary Table S2.** Neuropsychological data in DM1 patients according to the age of onset.

| Cognitive domain             | Tests                                 | Congenital/childhood            |                         | Juvenile/adult                  |                         |                                 | Late | P-value | Post-hoc               |         |
|------------------------------|---------------------------------------|---------------------------------|-------------------------|---------------------------------|-------------------------|---------------------------------|------|---------|------------------------|---------|
|                              |                                       | Corrected Score mean±sd (range) | Pathological scores (%) | Corrected Score mean±sd (range) | Pathological scores (%) | Corrected Score mean±sd (range) |      |         |                        |         |
| Cognitive screening          | MMSE                                  | 23.4±3.4 (19.0-27.0)            | 50.0                    | 26.9±1.5 (24.8-30)              | 4.5                     | 27.0±3.8 (19.0-30.0)            | 12.5 | 0.010*  | Congenital vs juvenile | 0.045*  |
|                              |                                       |                                 |                         |                                 |                         |                                 |      |         | Congenital vs late     | 0.11    |
|                              |                                       |                                 |                         |                                 |                         |                                 |      |         | Juvenile vs late       | 0.97    |
|                              |                                       |                                 |                         |                                 |                         |                                 |      |         |                        |         |
| Non-verbal Intelligence      | CPM-47                                | 16.5±4.3 (10.8-21.3)            | 75.0                    | 28.2±3.3 (22.9-36)              | 0                       | 26.0±6.6 (15.0-33.3)            | 25.0 | 0.0003* | Congenital vs juvenile | 0.0005* |
|                              |                                       |                                 |                         |                                 |                         |                                 |      |         | Congenital vs late     | 0.037*  |
|                              |                                       |                                 |                         |                                 |                         |                                 |      |         | Juvenile vs late       | 0.17    |
|                              |                                       |                                 |                         |                                 |                         |                                 |      |         |                        |         |
| Visuoperception              | BJLOT                                 | 13±6.8 (6.0-21.0)               | 75.0                    | 24.6±6.2 (8.0-30.0)             | 13.6                    | 21.6±6.3 (13.0-30.0)            | 37.5 | 0.0008* | Congenital vs juvenile | 0.0023* |
|                              |                                       |                                 |                         |                                 |                         |                                 |      |         | Congenital vs late     | 0.11    |
|                              |                                       |                                 |                         |                                 |                         |                                 |      |         | Juvenile vs late       | 0.19    |
|                              |                                       |                                 |                         |                                 |                         |                                 |      |         |                        |         |
|                              | SCT                                   | 4.6±1.3 (3.0-5.9)               | 0                       | 6.7±2.4 (1.3-10.3)              | 9.1                     | 6.2±1.7 (3.1-8.0)               | 0    | 0.15    |                        |         |
| Visuoconstructural abilities | ROCF-copy                             | 20±10.8 (9.0-30.3)              | 75.0                    | 28.5± 5.8 (13.8-36)             | 45.5                    | 27.8±9.7 (8.0-36.0)             | 37.5 | 0.06    |                        |         |
| Anosognosia                  | Measurement of Anosognosia Instrument | -3.0±1.2 (-4.0 - 2.0)           | 0                       | -1.2±2.0 (-5.0-2.0)             | 4.5                     | -0.4±2.5 (-4.0 - 3.0)           | 25   | 0.32    |                        |         |

(\*) statistically significant at p<0.05. MMSE: Mini-Mental State Examination, CPM-47: Raven's Colored Progressive Matrices, BJLOT: Benton Judgment of line orientation test-h version, SCT: Street's completion test, ROCF: Rey-Osterrieth complex figure.

**Supplementary Table S3.** <sup>1</sup>H-MRS results in DM1 patients according to the age of onset.

|               | <b>Congenital/childhood</b> | <b>Juvenile/adult</b>   | <b>Late</b>             | <b>P-value</b> | <b>Post-hoc</b>        |           |
|---------------|-----------------------------|-------------------------|-------------------------|----------------|------------------------|-----------|
| <b>NAA/Cr</b> | 1.72 ± 0.22 (1.44-1.93)     | 1.77 ± 0.21 (1.43-2.20) | 1.92 ± 0.22 (1.56-2.27) | < 0.0001 *     | Congenital vs HC       | 0.0005*   |
|               |                             |                         |                         |                | Juvenile vs HC         | < 0.0001* |
|               |                             |                         |                         |                | Late vs HC             | 0.0007*   |
|               |                             |                         |                         |                | Congenital vs juvenile | 0.97      |
|               |                             |                         |                         |                | Congenital vs late     | 0.37      |
|               |                             |                         |                         |                | Juvenile vs late       | 0.28      |
| <b>Cho/Cr</b> | 0.35 ± 0.02 (0.31-0.37)     | 0.34 ± 0.04 (0.27-0.44) | 0.35 ± 0.06 (0.29-0.44) | 0.8864         |                        |           |
| <b>ml/Cr</b>  | 0.97 ± 0.20 (0.69-1.15)     | 0.91 ± 0.18 (0.61-1.36) | 0.91 ± 0.13 (0.72-1.10) | 0.5348         |                        |           |
| <b>NAA/ml</b> | 1.82 ± 0.39 (1.44-2.36)     | 2.01 ± 0.48 (1.18-3.04) | 2.16 ± 0.44 (1.41-2.65) | 0.0002         | Congenital vs HC       | 0.0038*   |
|               |                             |                         |                         |                | Juvenile vs HC         | 0.0002*   |
|               |                             |                         |                         |                | Late vs HC             | 0.018*    |
|               |                             |                         |                         |                | Congenital vs juvenile | 0.88      |
|               |                             |                         |                         |                | Congenital vs late     | 0.66      |
|               |                             |                         |                         |                | Juvenile vs late       | 0.88      |

(\*) statistically significant at p<0.05. NAA: N-Acetyl-aspartate, Cr: creatine, Cho: choline, ml: myo-inositol.

**Supplementary Table S4.** Tissue fractions within parieto-occipital white matter <sup>1</sup>H-MRS volume of interest in DM1 patients according to the age of onset.

| <b>VOI</b>              | <b>Congenital/childhood</b> | <b>Juvenile/adult</b> | <b>Late</b>        | <b>P-value</b> |
|-------------------------|-----------------------------|-----------------------|--------------------|----------------|
| <b>% WM</b>             | 69 ± 8 (58-75)              | 71 ± 9 (56-89)        | 69 ± 9 (55-84)     | 0.31           |
| <b>% altered WM (§)</b> | 4.7 ± 2.6 (3.2-7.7)         | 5.5 ± 10.6 (0-45.6)   | 5.4 ± 6.3 (0-15.8) | 0.51           |
|                         | 3.2 [2.2]                   | 0.4 [6.7]             | 5.4 [9.0]          |                |
| <b>% GM</b>             | 20 ± 4 (17-26)              | 20 ± 7 (4-32)         | 21 ± 6 (13-30)     | 0.46           |
| <b>% CSF</b>            | 11 ± 9 (6-24)               | 9 ± 6 (2-28)          | 10 ± 6 (3-21)      | 0.67           |

WM: white matter, GM: grey matter, CSF: cerebrospinal fluid.
